# Supplementary material for: Multi-donor × elite-based populations reveal QTL for low-lodging wheat
Source: Theor Appl Genet. 2022 Mar 21;135(5):1685–703. doi: 10.1007/s00122-022-04063-6 (PMC9110543; doi:10.1007/s00122-022-04063-6)
Supplement: Supplementary file 1 — Supplementary file1 (XLSX 2075 KB) [file 122_2022_4063_MOESM1_ESM.xlsx]

## Sheet: Suppl. Figure 1
Supplementary Figure 1. Distribution of the final set of molecular markers across the 21 chromosomes.

## Sheet: Suppl. Figure 2
Supplementary Figure 2. Additive genetic effects for (a) lodging, (b) flowering date in days after sowing (DAS), (c) height and (d) yield for Gregory, Spitfire and Suntop populations.
Horizontal lines are recurrent parent effects; crosses are donor effects. Number of lines evaluated per population shown at the bottom of graph. In (a) note that a lower value of the additive genetic effect means a positive contribution towards lodging tolerance. In (d) Suntop populations there was no significant improvement in the partitionning into additive and non-additive effects.
(a)
(b)
(c)
(d)

## Sheet: Suppl. Figure 3
Supplementary Figure 3. Correlation matrix between traits. All populations and years included in the same graph.

## Sheet: Suppl. Figure 4
Supplementary Figure 4. Manhattan plot from single marker scan for lodging score for 2017 (a) and 2018 (b). Note that in 2018 the analysis was done on the logit scale.
(a) 2017
(b) 2018

## Sheet: Suppl. Table 1 - 2017
Supplementary Table 1. Predicted lodging score using the multi-marker model against observed lodging mean for each QTL combination for 2017. For each putative QTL, all the possible SNP values (-1 , 0 or 1) with at least one line are included. A SNP value is color coded with red if the value increases the predicted lodging score (base in the QTL effect), green if the value decreases the predicted …
Year	family	Crossing.parents	Donor	BobWhite_c8415_728	wsnp_Ex_c47152_52446529	D_contig55669_249	BobWhite_c15529_288	Ex_c3405_203	BS00011583_51	predicted value	standard error	n	raw mean	Q1	Q3
2017	1	Gregory*2/Cobra	Cobra	1	-1	-1	-1	1	-1	13.957	5.18812	3	17	11	23
2017	1	Gregory*2/Cobra	Cobra	-1	-1	-1	-1	-1	-1	10.798	4.97785	7	11.1429	5.5	18.5
2017	1	Gregory*2/Cobra	Cobra	1	-1	-1	-1	-1	1	24.3635	5.03034	10	29	23	37.25
2017	1	Gregory*2/Cobra	Cobra	1	-1	1	1	1	-1	12.5218	5.40518	1	9	9	9
2017	1	Gregory*2/Cobra	Cobra	-1	-1	-1	-1	1	0	8.08431	4.95455	2	23.5	20.75	26.25
2017	1	Gregory*2/Cobra	Cobra	-1	-1	-1	-1	-1	0	13.3623	4.9734	2	12	8.5	15.5
2017	1	Gregory*2/Cobra	Cobra	1	-1	-1	1	-1	1	30.7556	5.13931	1	11	11	11
2017	1	Gregory*2/Cobra	Cobra	-1	-1	-1	-1	-1	1	15.9266	5.11344	4	15	12	19.5
2017	1	Gregory*2/Cobra	Cobra	1	-1	-1	-1	-1	-1	19.235	5.09366	1	17	17	17
2017	1	Gregory*2/Cobra	Cobra	-1	-1	-1	-1	1	1	10.6486	5.08997	1	1	1	1
2017	1	Gregory*2/Cobra	Cobra	1	-1	-1	-1	1	1	19.0855	5.11574	1	27	27	27
2017	1	Gregory*2/Cobra	Cobra	-1	-1	-1	1	1	1	17.0406	5.26936	1	21	21	21
2017	1	Gregory*2/Cobra	Cobra	1	-1	-1	-1	-1	0	21.7992	4.98963	1	29	29	29
2017	1	Gregory*2/Cobra	Cobra	-1	-1	-1	-1	0	-1	8.15902	4.90619	1	13	13	13
2017	2	Gregory*2/RTHiY32	RTHiY32	1	-1	-1	-1	1	1	16.2933	4.9408	6	12	5	15
2017	2	Gregory*2/RTHiY32	RTHiY32	1	-1	1	-1	1	-1	3.33752	4.95601	4	4.5	1.75	4.75
2017	2	Gregory*2/RTHiY32	RTHiY32	1	0	-1	-1	1	1	21.1254	4.54801	1	18	18	18
2017	2	Gregory*2/RTHiY32	RTHiY32	1	-1	-1	-1	-1	1	21.5712	4.96705	14	28.5	18.25	32.75
2017	2	Gregory*2/RTHiY32	RTHiY32	1	1	0	1	1	-1	23.3075	4.96268	1	1	1	1
2017	2	Gregory*2/RTHiY32	RTHiY32	-1	-1	-1	-1	0	0	7.93101	5.07665	2	5	3	7
2017	2	Gregory*2/RTHiY32	RTHiY32	-1	1	-1	-1	1	-1	12.3921	5.14294	1	26	26	26
2017	2	Gregory*2/RTHiY32	RTHiY32	1	1	-1	-1	-1	1	31.2356	4.80824	9	33.3333	30	40
2017	2	Gregory*2/RTHiY32	RTHiY32	1	0	1	-1	-1	1	18.5762	4.68478	2	4.5	2.25	6.75
2017	2	Gregory*2/RTHiY32	RTHiY32	1	-1	-1	-1	-1	-1	16.4427	4.93988	16	12.0625	4.75	18.25
2017	2	Gregory*2/RTHiY32	RTHiY32	1	0	-1	-1	-1	1	26.4034	4.54179	2	28	27	29
2017	2	Gregory*2/RTHiY32	RTHiY32	1	-1	-1	-1	1	-1	11.1647	4.92414	6	17.8333	10	20.75
2017	2	Gregory*2/RTHiY32	RTHiY32	1	-1	-1	-1	1	0	13.729	4.85808	1	25	25	25
2017	2	Gregory*2/RTHiY32	RTHiY32	1	-1	1	1	-1	-1	15.0075	5.21059	1	31	31	31
2017	2	Gregory*2/RTHiY32	RTHiY32	1	-1	1	-1	-1	-1	8.6155	5.02225	4	18.25	13	25.75
2017	2	Gregory*2/RTHiY32	RTHiY32	1	1	-1	1	1	1	32.3496	4.9886	1	30	30	30
2017	2	Gregory*2/RTHiY32	RTHiY32	1	1	1	1	-1	1	29.8004	5.0824	1	32	32	32
2017	2	Gregory*2/RTHiY32	RTHiY32	1	-1	1	-1	1	1	8.46607	4.98152	5	11.2	5	18
2017	2	Gregory*2/RTHiY32	RTHiY32	1	1	-1	-1	-1	-1	26.107	4.81204	4	27.5	20.25	37.25
2017	2	Gregory*2/RTHiY32	RTHiY32	1	-1	1	-1	-1	1	13.7441	5.0578	2	7.5	4.25	10.75
2017	2	Gregory*2/RTHiY32	RTHiY32	1	1	-1	-1	1	-1	20.8291	4.86144	3	21	15.5	31
2017	2	Gregory*2/RTHiY32	RTHiY32	1	1	1	-1	-1	-1	18.2799	4.9795	1	5	5	5
2017	2	Gregory*2/RTHiY32	RTHiY32	1	0	-1	-1	-1	0	23.8391	4.45435	1	31	31	31
2017	2	Gregory*2/RTHiY32	RTHiY32	1	1	1	1	-1	-1	24.6719	5.10406	1	26	26	26
2017	2	Gregory*2/RTHiY32	RTHiY32	1	1	-1	1	-1	-1	32.4991	4.93484	1	17	17	17
2017	2	Gregory*2/RTHiY32	RTHiY32	1	0	-1	-1	-1	-1	21.2749	4.52897	1	5	5	5
2017	2	Gregory*2/RTHiY32	RTHiY32	1	-1	-1	1	1	-1	17.5567	5.15612	1	26	26	26
2017	2	Gregory*2/RTHiY32	RTHiY32	-1	-1	-1	-1	1	0	5.29202	5.07509	1	1	1	1
2017	2	Gregory*2/RTHiY32	RTHiY32	1	-1	-1	1	-1	1	27.9633	5.12506	2	28	20.5	35.5
2017	2	Gregory*2/RTHiY32	RTHiY32	1	-1	-1	1	0	1	25.3243	5.07252	1	33	33	33
2017	2	Gregory*2/RTHiY32	RTHiY32	-1	-1	-1	-1	1	-1	2.72774	5.03966	1	9	9	9
2017	2	Gregory*2/RTHiY32	RTHiY32	1	-1	-1	1	-1	-1	22.8347	5.12548	1	5	5	5
2017	2	Gregory*2/RTHiY32	RTHiY32	1	-1	-1	1	1	1	22.6853	5.14553	1	34	34	34
2017	3	Gregory*2/RTHiY40	RTHiY40	1	-1	-1	-1	-1	1	17.0867	4.82416	23	16.2174	9	24
2017	3	Gregory*2/RTHiY40	RTHiY40	1	-1	1	-1	-1	1	9.25956	4.82581	13	13	7	17
2017	3	Gregory*2/RTHiY40	RTHiY40	1	0	1	-1	1	1	8.81376	4.50822	1	13	13	13
2017	3	Gregory*2/RTHiY40	RTHiY40	1	-1	1	-1	-1	-1	4.13101	4.89539	6	7	5	8.75
2017	3	Gregory*2/RTHiY40	RTHiY40	1	-1	1	-1	-1	0	6.69529	4.78521	4	2.75	-0.25	6
2017	3	Gregory*2/RTHiY40	RTHiY40	1	-1	-1	-1	-1	-1	11.9582	4.90287	4	12	5	18
2017	3	Gregory*2/RTHiY40	RTHiY40	-1	1	-1	-1	1	1	13.0362	5.42505	1	5	5	5
2017	3	Gregory*2/RTHiY40	RTHiY40	1	-1	0	-1	-1	1	13.1732	4.69162	1	17	17	17
2017	3	Gregory*2/RTHiY40	RTHiY40	1	-1	1	-1	1	1	3.98158	4.77456	2	2	1.5	2.5
2017	3	Gregory*2/RTHiY40	RTHiY40	1	-1	-1	1	-1	1	23.4788	5.00912	1	18	18	18
2017	3	Gregory*2/RTHiY40	RTHiY40	1	-1	1	-1	1	0	1.41731	4.73904	1	2	2	2
2017	3	Gregory*2/RTHiY40	RTHiY40	1	-1	-1	0	1	-1	9.87623	4.93771	1	2	2	2
2017	3	Gregory*2/RTHiY40	RTHiY40	1	1	-1	-1	-1	1	26.7511	4.83845	1	34	34	34
2017	3	Gregory*2/RTHiY40	RTHiY40	1	-1	-1	-1	1	1	11.8088	4.82558	3	9.33333	5.5	15
2017	3	Gregory*2/RTHiY40	RTHiY40	1	-1	-1	-1	1	-1	6.68021	4.91494	4	15.75	10	20.75
2017	3	Gregory*2/RTHiY40	RTHiY40	1	-1	-1	1	0	0	18.2755	4.95072	1	5	5	5
2017	3	Gregory*2/RTHiY40	RTHiY40	-1	-1	-1	-1	1	1	3.3718	5.19565	1	13	13	13
2017	3	Gregory*2/RTHiY40	RTHiY40	1	-1	-1	-1	-1	0	14.5225	4.7882	1	25	25	25
2017	3	Gregory*2/RTHiY40	RTHiY40	-1	0	-1	-1	1	0	5.6397	4.87073	1	0	0	0
2017	3	Gregory*2/RTHiY40	RTHiY40	1	-1	-1	1	1	0	15.6365	5.0417	1	42	42	42
2017	3	Gregory*2/RTHiY40	RTHiY40	-1	-1	-1	-1	1	-1	-1.75675	5.08487	1	5	5	5
2017	4	Gregory*2/RTHiY57	RTHiY57	1	-1	-1	1	-1	1	22.2282	4.80568	19	21.3684	14.5	27.5
2017	4	Gregory*2/RTHiY57	RTHiY57	1	-1	-1	-1	-1	1	15.8362	4.77729	30	14.6333	5	24.75
2017	4	Gregory*2/RTHiY57	RTHiY57	1	-1	-1	-1	1	1	10.5582	4.71448	14	8.21429	1.25	13.75
2017	4	Gregory*2/RTHiY57	RTHiY57	0	1	1	1	0	0	14.6436	4.95991	1	15	15	15
2017	4	Gregory*2/RTHiY57	RTHiY57	-1	-1	-1	-1	1	-1	-3.00734	4.95509	1	2	2	2
2017	4	Gregory*2/RTHiY57	RTHiY57	1	-1	-1	0	-1	1	19.0322	4.67992	4	15.75	9	19.75
2017	4	Gregory*2/RTHiY57	RTHiY57	1	-1	-1	-1	-1	-1	10.7076	4.84807	2	19.5	14.25	24.75
2017	4	Gregory*2/RTHiY57	RTHiY57	1	-1	-1	1	1	-1	11.8217	4.90184	1	5	5	5
2017	4	Gregory*2/RTHiY57	RTHiY57	1	-1	-1	-1	1	-1	5.42962	4.79711	2	11	8	14
2017	4	Gregory*2/RTHiY57	RTHiY57	1	0	-1	1	1	-1	16.6538	4.60367	1	17	17	17
2017	4	Gregory*2/RTHiY57	RTHiY57	1	-1	-1	1	1	1	16.9502	4.79256	2	13	7	19
2017	4	Gregory*2/RTHiY57	RTHiY57	-1	-1	-1	-1	1	1	2.12121	5.07702	1	-4	-4	-4
2017	4	Gregory*2/RTHiY57	RTHiY57	1	-1	-1	1	-1	-1	17.0996	4.90401	1	2	2	2
2017	4	Gregory*2/RTHiY57	RTHiY57	1	-1	1	-1	1	-1	-2.39756	4.86577	2	3	2	4

## Sheet: Suppl. Table 2 - 2018
Supplementary Table 2. Predicted logit (lodging score) using the multi-marker model against observed logit (lodging score) mean for each QTL combination in 2018. Values were back transformed to the original lodging scale, standard error of prediction are approximate. For each putative QTL, all the possible SNP values (-1 , 0 or 1) with at least one line are included. A SNP value is color coded wi…
Year	family	Crossing.parents	Donor	wsnp_CAP11_c1196_692246	Excalibur_rep_c102984_157	Tdurum_contig22253_104	wsnp_Ex_c12450_19850827	RAC875_rep_c77148_311	Excalibur_c30739_72	BS00071655_51	Tdurum_contig9934_103	predicted value	standard error	lodging score predicted value	lodging score approx standard error	n	logit raw mean	logit Q1	logit Q3	lodging score raw mean
2018	1	Gregory*2/Cobra	Cobra	1	-1	-1	-1	-1	-1	-1	-1	-1.81938	0.130027	6.74098	1.8731	2	-2	-2	-2	4.30435
2018	1	Gregory*2/Cobra	Cobra	1	1	1	-1	-1	1	1	-1	-2.20139	0.124624	1.95512	1.34146	2	-2	-2	-2	4.30435
2018	1	Gregory*2/Cobra	Cobra	1	-1	-1	-1	-1	1	1	-1	-2.19594	0.111786	2.01392	1.20853	1	-2	-2	-2	4.30435
2018	1	Gregory*2/Cobra	Cobra	1	-1	1	-1	1	-1	1	-1	-1.5182	0.117458	11.5672	2.07794	6	-1.5	-2	-1	11.8911
2018	1	Gregory*2/Cobra	Cobra	1	-1	1	-1	-1	1	1	-1	-1.90494	0.11193	5.54599	1.51463	3	-1.66667	-2	-1.5	9.06429
2018	1	Gregory*2/Cobra	Cobra	1	-1	-1	1	-1	1	1	1	-1.75141	0.123621	7.74427	1.86921	1	-2	-2	-2	4.30435
2018	1	Gregory*2/Cobra	Cobra	1	1	1	-1	1	-1	1	-1	-1.81464	0.130989	6.80937	1.89341	1	-1	-1	-1	22.273
2018	1	Gregory*2/Cobra	Cobra	1	-1	1	-1	-1	1	-1	-1	-1.71019	0.129605	8.37673	2.01699	1	-2	-2	-2	4.30435
2018	1	Gregory*2/Cobra	Cobra	1	-1	1	-1	0	1	1	-1	-1.80247	0.104328	6.98606	1.52127	2	-1.5	-1.75	-1.25	11.8911
2018	1	Gregory*2/Cobra	Cobra	1	-1	-1	0	-1	1	1	1	-1.88351	0.119889	5.83833	1.64823	1	-3	-3	-3	-4.3089
2018	1	Gregory*2/Cobra	Cobra	1	-1	-1	1	-1	-1	-1	-1	-1.55519	0.132942	10.9206	2.29634	1	-2	-2	-2	4.30435
2018	1	Gregory*2/Cobra	Cobra	1	-1	1	-1	1	1	1	1	-1.51967	0.128429	11.5412	2.26991	2	-1	-1	-1	22.273
2018	1	Gregory*2/Cobra	Cobra	1	1	1	-1	-1	-1	1	-1	-2.01959	0.130641	4.05939	1.62154	1	-2	-2	-2	4.30435
2018	1	Gregory*2/Cobra	Cobra	1	1	1	-1	0	-1	1	-1	-1.91711	0.125715	5.38204	1.68588	1	-1	-1	-1	22.273
2018	1	Gregory*2/Cobra	Cobra	1	-1	0	1	-1	1	1	1	-1.60592	0.122416	10.0587	2.04506	1	-1	-1	-1	22.273
2018	1	Gregory*2/Cobra	Cobra	-1	-1	-1	1	-1	1	1	1	-1.3238	0.165339	15.2224	3.29373	1	-2	-2	-2	4.30435
2018	1	Gregory*2/Cobra	Cobra	1	-1	1	-1	1	1	1	-1	-1.7	0.108889	8.53587	1.70659	9	-1.77778	-2	-2	7.34933
2018	2	Gregory*2/RTHiY32	RTHiY32	1	-1	1	-1	1	1	1	-1	-1.36168	0.0964259	14.4761	1.87874	27	-1.40741	-2	-1	13.5972
2018	2	Gregory*2/RTHiY32	RTHiY32	1	-1	-1	1	-1	1	1	-1	-1.59342	0.113709	10.2683	1.91542	1	-1	-1	-1	22.273
2018	2	Gregory*2/RTHiY32	RTHiY32	1	-1	1	-1	1	-1	1	-1	-1.17988	0.109679	18.2089	2.36663	4	-1	-1.25	-0.75	22.273
2018	2	Gregory*2/RTHiY32	RTHiY32	1	1	1	-1	1	1	1	-1	-1.65812	0.109344	9.20173	1.76362	8	-1.75	-2	-1.75	7.76566
2018	2	Gregory*2/RTHiY32	RTHiY32	1	1	-1	-1	-1	-1	1	1	-1.79193	0.131613	7.14032	1.93367	1	-2	-2	-2	4.30435
2018	2	Gregory*2/RTHiY32	RTHiY32	1	1	1	-1	-1	1	1	1	-1.68274	0.125695	8.80798	1.99354	1	-2	-2	-2	4.30435
2018	2	Gregory*2/RTHiY32	RTHiY32	-1	1	1	-1	1	-1	1	1	-0.868379	0.142237	25.471	3.55393	2	-1	-1	-1	22.273
2018	2	Gregory*2/RTHiY32	RTHiY32	-1	1	1	-1	1	1	1	-1	-1.23051	0.160001	17.1311	3.35954	2	-1.5	-1.75	-1.25	11.8911
2018	2	Gregory*2/RTHiY32	RTHiY32	1	-1	1	1	-1	-1	-1	1	-0.745547	0.133922	28.6151	3.50729	1	0	0	0	50
2018	2	Gregory*2/RTHiY32	RTHiY32	1	-1	1	-1	1	-1	1	1	-0.999551	0.118774	22.2836	2.80286	3	-1	-1	-1	22.273
2018	2	Gregory*2/RTHiY32	RTHiY32	1	-1	1	-1	1	1	1	1	-1.18135	0.111642	18.1772	2.40711	4	-1.25	-1.25	-1	16.724
2018	2	Gregory*2/RTHiY32	RTHiY32	1	1	1	-1	1	-1	-1	-1	-1.28157	0.134044	16.0741	2.73566	1	0	0	0	50
2018	2	Gregory*2/RTHiY32	RTHiY32	1	-1	-1	-1	-1	1	1	-1	-1.85762	0.105079	6.19772	1.4723	2	-1.5	-1.75	-1.25	11.8911
2018	2	Gregory*2/RTHiY32	RTHiY32	1	-1	-1	1	-1	1	1	1	-1.41309	0.109648	13.4896	2.07143	5	-1.4	-2	-1	13.7379
2018	2	Gregory*2/RTHiY32	RTHiY32	1	1	1	-1	1	-1	1	-1	-1.47632	0.116169	12.318	2.11048	6	-1.16667	-1	-1	18.495
2018	2	Gregory*2/RTHiY32	RTHiY32	-1	-1	1	-1	1	-1	1	1	-0.571936	0.145246	33.2948	4.0196	4	0	-0.25	0.25	50
2018	2	Gregory*2/RTHiY32	RTHiY32	1	-1	1	-1	0	1	1	-1	-1.46415	0.0973255	12.54	1.78166	2	-1.5	-1.75	-1.25	11.8911
2018	2	Gregory*2/RTHiY32	RTHiY32	-1	1	1	-1	1	1	1	1	-1.05018	0.143865	21.1029	3.31483	1	0	0	0	50
2018	2	Gregory*2/RTHiY32	RTHiY32	1	-1	1	-1	1	-1	-1	-1	-0.985123	0.123755	22.6252	2.93982	1	-1	-1	-1	22.273
2018	2	Gregory*2/RTHiY32	RTHiY32	1	-1	-1	-1	1	-1	1	-1	-1.47087	0.122416	12.4172	2.23158	2	-1.5	-1.75	-1.25	11.8911
2018	2	Gregory*2/RTHiY32	RTHiY32	1	-1	-1	1	-1	1	-1	1	-1.21834	0.121766	17.3875	2.57376	1	-1	-1	-1	22.273
2018	2	Gregory*2/RTHiY32	RTHiY32	0	1	-1	1	-1	1	1	1	-1.49573	0.12148	11.9676	2.1801	1	-1	-1	-1	22.273
2018	2	Gregory*2/RTHiY32	RTHiY32	1	0	1	1	0	1	1	1	-1.16785	0.11602	18.4693	2.51939	1	-2	-2	-2	4.30435
2018	2	Gregory*2/RTHiY32	RTHiY32	1	1	-1	-1	-1	1	1	-1	-2.15406	0.114137	2.4743	1.27577	2	-2	-2	-2	4.30435
2018	2	Gregory*2/RTHiY32	RTHiY32	1	-1	0	1	1	-1	1	-1	-1.06118	0.12793	20.85	2.93203	1	-2	-2	-2	4.30435
2018	2	Gregory*2/RTHiY32	RTHiY32	1	-1	-1	-1	-1	-1	1	-1	-1.67582	0.119167	8.91799	1.89899	1	-2	-2	-2	4.30435
2018	2	Gregory*2/RTHiY32	RTHiY32	1	-1	-1	-1	0	-1	1	-1	-1.57335	0.11526	10.6088	1.96743	1	-1	-1	-1	22.273
2018	2	Gregory*2/RTHiY32	RTHiY32	1	-1	-1	1	0	1	1	1	-1.31062	0.110327	15.4859	2.21461	1	-2	-2	-2	4.30435
2018	2	Gregory*2/RTHiY32	RTHiY32	-1	-1	-1	-1	1	-1	1	1	-0.862929	0.155191	25.6073	3.88623	1	-1	-1	-1	22.273
2018	2	Gregory*2/RTHiY32	RTHiY32	0	-1	1	-1	1	1	1	0	-1.05771	0.103284	20.9298	2.37117	1	-1	-1	-1	22.273
2018	2	Gregory*2/RTHiY32	RTHiY32	1	1	-1	-1	1	-1	1	-1	-1.76731	0.131644	7.5052	1.96829	1	-2	-2	-2	4.30435
2018	2	Gregory*2/RTHiY32	RTHiY32	1	-1	1	-1	1	1	-1	-1	-1.16692	0.123627	18.4894	2.68588	1	-1	-1	-1	22.273
2018	2	Gregory*2/RTHiY32	RTHiY32	1	-1	-1	-1	0	1	1	-1	-1.75514	0.102568	7.68795	1.54681	1	-2	-2	-2	4.30435
2018	2	Gregory*2/RTHiY32	RTHiY32	1	-1	1	1	-1	1	1	1	-1.1221	0.12444	19.4746	2.76693	1	-1	-1	-1	22.273
2018	2	Gregory*2/RTHiY32	RTHiY32	-1	-1	1	-1	1	1	1	1	-0.753735	0.142723	28.401	3.72683	1	-1	-1	-1	22.273
2018	2	Gregory*2/RTHiY32	RTHiY32	1	-1	1	1	1	1	1	-1	-1.09748	0.12172	20.0254	2.74025	1	1	1	1	77.727
2018	2	Gregory*2/RTHiY32	RTHiY32	0	-1	1	-1	1	1	1	1	-0.967542	0.108481	23.0445	2.59758	2	-0.5	-1.25	0.25	35.3049
2018	2	Gregory*2/RTHiY32	RTHiY32	1	-1	-1	-1	1	1	1	-1	-1.65267	0.112318	9.2898	1.81832	2	-1.5	-1.75	-1.25	11.8911
2018	3	Gregory*2/RTHiY40	RTHiY40	1	-1	1	-1	1	-1	-1	-1	-1.13	0.120103	19.2994	2.65976	4	-1.25	-1.25	-1	16.724
2018	3	Gregory*2/RTHiY40	RTHiY40	1	-1	1	-1	1	-1	1	1	-1.14443	0.130298	18.9811	2.8642	2	-1	-1	-1	22.273
2018	3	Gregory*2/RTHiY40	RTHiY40	1	-1	1	-1	-1	-1	-1	-1	-1.33494	0.125236	15.0011	2.47871	1	-1	-1	-1	22.273
2018	3	Gregory*2/RTHiY40	RTHiY40	1	1	1	-1	1	1	1	1	-1.62267	0.142419	9.7805	2.35275	1	-2	-2	-2	4.30435
2018	3	Gregory*2/RTHiY40	RTHiY40	1	1	1	-1	1	-1	1	1	-1.44087	0.141082	12.9693	2.62028	1	-2	-2	-2	4.30435
2018	3	Gregory*2/RTHiY40	RTHiY40	1	1	-1	-1	-1	-1	1	-1	-2.11714	0.12675	2.8931	1.45861	1	-2	-2	-2	4.30435
2018	3	Gregory*2/RTHiY40	RTHiY40	1	-1	1	-1	1	1	1	-1	-1.50655	0.107517	11.774	1.91628	7	-1.42857	-2	-1	13.1986
2018	3	Gregory*2/RTHiY40	RTHiY40	1	-1	1	-1	1	-1	1	-1	-1.32475	0.116024	15.2034	2.31003	4	-1.25	-1.25	-1	16.724
2018	3	Gregory*2/RTHiY40	RTHiY40	1	-1	-1	-1	-1	1	1	1	-1.82216	0.127818	6.70095	1.83758	1	-2	-2	-2	4.30435
2018	3	Gregory*2/RTHiY40	RTHiY40	1	-1	-1	-1	-1	-1	1	-1	-1.82069	0.118384	6.72209	1.70377	1	-1	-1	-1	22.273
2018	3	Gregory*2/RTHiY40	RTHiY40	1	-1	0	-1	0	1	1	-1	-1.75452	0.10008	7.69733	1.50994	1	-1	-1	-1	22.273
2018	3	Gregory*2/RTHiY40	RTHiY40	1	-1	-1	1	-1	-1	-1	-1	-1.36174	0.109531	14.4749	2.134	3	-1.66667	-2	-1.5	9.06429
2018	3	Gregory*2/RTHiY40	RTHiY40	1	-1	-1	1	0	-1	1	-1	-1.45403	0.117207	12.7259	2.1592	1	-1	-1	-1	22.273
2018	3	Gregory*2/RTHiY40	RTHiY40	1	-1	1	-1	-1	1	1	-1	-1.7115	0.116772	8.35632	1.81561	1	-2	-2	-2	4.30435
2018	3	Gregory*2/RTHiY40	RTHiY40	1	-1	-1	-1	-1	1	1	-1	-2.00249	0.1081	4.27299	1.3594	3	-2	-2	-2	4.30435
2018	3	Gregory*2/RTHiY40	RTHiY40	1	-1	1	-1	-1	1	-1	-1	-1.51674	0.125274	11.593	2.21829	1	-1	-1	-1	22.273
2018	3	Gregory*2/RTHiY40	RTHiY40	1	-1	-1	-1	1	1	1	-1	-1.79754	0.118948	7.05802	1.7406	2	-1.5	-1.75	-1.25	11.8911
2018	3	Gregory*2/RTHiY40	RTHiY40	1	-1	-1	-1	1	1	-1	-1	-1.60279	0.135228	10.1111	2.2638	1	-1	-1	-1	22.273
2018	3	Gregory*2/RTHiY40	RTHiY40	1	-1	-1	1	1	1	1	-1	-1.53335	0.118975	11.3005	2.0844	4	-1.5	-2	-1	11.8911
2018	3	Gregory*2/RTHiY40	RTHiY40	1	-1	1	1	1	1	1	-1	-1.24236	0.121633	16.8831	2.53735	3	-1.33333	-1.5	-1	15.033
2018	3	Gregory*2/RTHiY40	RTHiY40	1	-1	1	1	1	-1	1	-1	-1.06056	0.130708	20.8643	2.99659	1	-1	-1	-1	22.273
2018	3	Gregory*2/RTHiY40	RTHiY40	1	1	1	1	1	-1	-1	1	-0.981916	0.143464	22.7014	3.41299	1	-1	-1	-1	22.273
2018	3	Gregory*2/RTHiY40	RTHiY40	1	-1	-1	-1	-1	1	-1	-1	-1.80773	0.119241	6.90946	1.73217	3	-1.66667	-2	-1.5	9.06429
2018	3	Gregory*2/RTHiY40	RTHiY40	1	1	1	-1	-1	1	1	-1	-2.00794	0.126491	4.20459	1.58407	1	-2	-2	-2	4.30435
2018	3	Gregory*2/RTHiY40	RTHiY40	1	-1	0	-1	-1	-1	-1	1	-1.30011	0.12726	15.6976	2.56996	1	-1	-1	-1	22.273
2018	3	Gregory*2/RTHiY40	RTHiY40	1	-1	1	-1	-1	-1	1	-1	-1.5297	0.127774	11.3645	2.24381	1	-2	-2	-2	4.30435
2018	3	Gregory*2/RTHiY40	RTHiY40	1	-1	-1	1	-1	-1	1	-1	-1.5565	0.118355	10.898	2.04265	1	-1	-1	-1	22.273
2018	3	Gregory*2/RTHiY40	RTHiY40	1	-1	0	1	-1	-1	-1	1	-1.03592	0.108806	21.4326	2.52421	1	-1	-1	-1	22.273
2018	3	Gregory*2/RTHiY40	RTHiY40	1	-1	1	1	-1	1	-1	-1	-1.25255	0.129164	16.6711	2.67928	1	-1	-1	-1	22.273
2018	3	Gregory*2/RTHiY40	RTHiY40	1	1	1	-1	0	1	1	1	-1.72514	0.136993	8.14524	2.1099	1	-3	-3	-3	-4.3089
2018	3	Gregory*2/RTHiY40	RTHiY40	1	-1	-1	-1	1	-1	1	-1	-1.61575	0.125256	9.89508	2.07883	1	-1	-1	-1	22.273
2018	3	Gregory*2/RTHiY40	RTHiY40	1	-1	-1	1	0	1	1	-1	-1.63582	0.10684	9.56409	1.74944	1	-2	-2	-2	4.30435
2018	3	Gregory*2/RTHiY40	RTHiY40	1	-1	1	1	-1	1	1	1	-1.26698	0.126545	16.373	2.60389	1	-1	-1	-1	22.273
2018	3	Gregory*2/RTHiY40	RTHiY40	1	-1	-1	1	0	-1	-1	1	-1.07894	0.110613	20.4448	2.51322	1	-1	-1	-1	22.273
2018	3	Gregory*2/RTHiY40	RTHiY40	1	-1	-1	1	1	-1	-1	1	-0.976466	0.125913	22.8312	3.00287	1	-1	-1	-1	22.273
2018	3	Gregory*2/RTHiY40	RTHiY40	1	-1	1	1	1	-1	-1	-1	-0.865803	0.127295	25.5354	3.18396	1	-1	-1	-1	22.273
2018	3	Gregory*2/RTHiY40	RTHiY40	1	-1	0	1	1	1	-1	-1	-1.1931	0.122877	17.9246	2.63281	1	-1	-1	-1	22.273
2018	3	Gregory*2/RTHiY40	RTHiY40	1	-1	-1	1	-1	1	1	1	-1.55797	0.10873	10.8726	1.87474	2	-1	-1	-1	22.273
2018	3	Gregory*2/RTHiY40	RTHiY40	1	1	-1	-1	-1	1	1	-1	-2.29893	0.122183	0.945355	1.21535	1	-2	-2	-2	4.30435
2018	3	Gregory*2/RTHiY40	RTHiY40	1	-1	-1	1	-1	-1	-1	1	-1.18141	0.105986	18.1758	2.28508	1	-1	-1	-1	22.273
2018	3	Gregory*2/RTHiY40	RTHiY40	1	-1	-1	1	-1	1	-1	0	-1.45338	0.102744	12.7379	1.89352	1	-1	-1	-1	22.273
2018	3	Gregory*2/RTHiY40	RTHiY40	1	-1	1	-1	1	1	-1	-1	-1.3118	0.123382	15.4624	2.47499	1	-2	-2	-2	4.30435
2018	3	Gregory*2/RTHiY40	RTHiY40	1	-1	1	1	1	-1	-1	1	-0.685474	0.124068	30.2049	3.31692	1	0	0	0	50
2018	3	Gregory*2/RTHiY40	RTHiY40	1	-1	-1	1	-1	1	1	-1	-1.7383	0.106258	7.94352	1.62155	3	-1.66667	-2	-1.5	9.06429
2018	4	Gregory*2/RTHiY57	RTHiY57	1	-1	1	-1	1	-1	1	-1	-1.44506	0.112425	12.8916	2.08265	3	-1.66667	-2	-1.5	9.06429
2018	4	Gregory*2/RTHiY57	RTHiY57	1	-1	1	-1	1	1	1	-1	-1.62686	0.0938635	9.7114	1.54627	42	-1.57143	-2	-1	10.6415
2018	4	Gregory*2/RTHiY57	RTHiY57	1	-1	-1	-1	1	1	-1	-1	-1.72309	0.134128	8.17682	2.06872	1	-1	-1	-1	22.273
2018	4	Gregory*2/RTHiY57	RTHiY57	-1	1	-1	0	-1	0	0	0	-1.58108	0.162224	10.4771	2.75502	1	-2	-2	-2	4.30435
2018	4	Gregory*2/RTHiY57	RTHiY57	1	-1	-1	1	-1	1	1	1	-1.67827	0.113569	8.87894	1.80675	2	-2	-2	-2	4.30435
2018	4	Gregory*2/RTHiY57	RTHiY57	1	-1	1	-1	-1	-1	1	-1	-1.65	0.122918	9.33303	1.99351	1	-2	-2	-2	4.30435
2018	4	Gregory*2/RTHiY57	RTHiY57	1	-1	-1	-1	-1	1	1	-1	-2.12279	0.099649	2.82812	1.14166	6	-2	-2	-2	4.30435
2018	4	Gregory*2/RTHiY57	RTHiY57	1	-1	1	-1	-1	1	-1	-1	-1.63704	0.116674	9.54411	1.9089	1	-2	-2	-2	4.30435
2018	4	Gregory*2/RTHiY57	RTHiY57	1	-1	-1	-1	-1	-1	-1	-1	-1.74624	0.122814	7.82267	1.86377	1	-2	-2	-2	4.30435
2018	4	Gregory*2/RTHiY57	RTHiY57	1	1	-1	1	-1	1	1	1	-1.97471	0.135343	4.62602	1.73826	1	-1	-1	-1	22.273
2018	4	Gregory*2/RTHiY57	RTHiY57	1	1	1	-1	0	1	1	-1	-2.02577	0.111266	3.98283	1.37453	1	-2	-2	-2	4.30435
2018	4	Gregory*2/RTHiY57	RTHiY57	1	-1	1	-1	-1	1	1	-1	-1.8318	0.102425	6.56285	1.4623	10	-2	-2	-2	4.30435
2018	4	Gregory*2/RTHiY57	RTHiY57	1	-1	1	-1	1	1	-1	-1	-1.4321	0.116351	13.1326	2.17266	3	-1	-1.5	-0.5	22.273
2018	4	Gregory*2/RTHiY57	RTHiY57	1	-1	0	-1	-1	-1	-1	-1	-1.60074	0.117787	10.1453	1.97451	1	-2	-2	-2	4.30435
2018	4	Gregory*2/RTHiY57	RTHiY57	1	-1	-1	1	-1	1	-1	1	-1.48351	0.120182	12.1877	2.17353	2	-1.5	-1.75	-1.25	11.8911
2018	4	Gregory*2/RTHiY57	RTHiY57	1	-1	0	1	0	-1	-1	1	-1.05375	0.123598	21.0208	2.84296	1	-1	-1	-1	22.273
2018	4	Gregory*2/RTHiY57	RTHiY57	1	-1	-1	-1	1	1	1	-1	-1.91785	0.113085	5.37221	1.51568	4	-1.75	-2	-1.75	7.76566

## Sheet: Suppl. Table 3
Supplementary Table 3. Linkage disequilibrium between putative QTL for lodging between 2017 and 2018 presented in Table 4 in the main manuscript.
			Pos	451078548	641109645	495024538 3	124260727 4	56399941	23437723	112890988	.
			Chr	7B	2D	3A	4D	3A	6A	7B	5
SNP name - 2017	Chr	Pos	SNP name - 2018	wsnp_CAP11_c1196_692246	Excalibur_rep_c102984_157	Tdurum_contig22253_104	wsnp_Ex_c12450_19850827	RAC875_rep_c77148_311	BS00071655_51	Tdurum_contig9934_103	Excalibur_c30739_72
BobWhite_c8415_728	7D	13610617		0.00302989	0.0194507	0.00253041	1.93315e-05	0.0303303	0.0222939	9.77101e-05	0.0257257
wsnp_Ex_c47152_52446529	5B	476636741		0.0744775	0.0360765	0.000528536	0.00400713	0.00357284	0.00638696	0.0426492	0.00107374
D_contig55669_249	7D	630707433		0.00250463	0.000323338	0.000843369	0.0144348	0.00938637	0.00475303	0.00990705	0.0111157
BobWhite_c15529_288	4B	66058159 1		0.00872546	0.00172751	0.0108862	0.000309285	0.000550803	0.00287473	0.00846457	0.00454668
Ex_c3405_203	6B	903614 2		0.00119605	0.0126094	0.0293833	0.0271423	0.0436298	0.000107843	0.0434423	0.000113825
BS00011583_51	7D	22528719		0.021005	0.00500757	0.0451404	0.0590987	0.0271162	0.00449691	0.161761	0.00052706
1 Inferred position based on LD. This SNP has been mapped to 4B in several biparental populations (Wang et al. 2014)
2 Inferred position based on LD. This SNP mapped has been mapped to 6D (pos. 3976771) in the IWGSC Chinese Spring reference genome version .1.0 (IWGSC 2018).
3 Shows homology to other locations, genetically mapped only to 3A
4 Inferred position based on LD. This SNP has been genetically mapped in biparental populations (Wang et al. 2014) and LD to 6D (inferred position 470684296)
5 Maps to multiple locations

## Sheet: Suppl. Table 4
Supplementary Table 4. Markers that presented a significant association with plant height or days to flower at each year (pvalue < 0.001 or equivalently LOD = -log(p) > 3). "." means the SNP maps to multiple locations.
Year	Trait	SNP name	Chr	Pos	pvalue	LOD
2017	height	BobWhite_c3552_1303	.	.	0.000780629	3.10756
2017	height	Tdurum_contig47816_258	.	.	0.000400532	3.39736
2017	height	Ra_c19501_1510	.	.	3.32938e-05	4.47764
2017	height	Kukri_c51047_475	.	.	0.000231506	3.63544
2017	height	BS00009443_51	.	.	0.000668134	3.17514
2017	height	Kukri_c29560_156	5B	567156775	0.000409377	3.38788
2017	height	RAC875_c20785_1219	5B	566973104	0.000938664	3.02749
2017	height	tplb0060e05_1182	5B	572343072	0.000765731	3.11592
2017	height	IACX10195	5B	571185827	0.000779095	3.10841
2017	height	wsnp_JD_c37023_27225840	5B	570642920	0.000717911	3.14393
2017	height	IAAV2219	5B	577302172	0.00088869	3.05125
2017	height	BobWhite_c3552_1588	5B	577303366	0.000809437	3.09182
2017	height	IAAV8463	5B	577305479	0.00099418	3.00254
2017	height	wsnp_Ra_c20970_30293227	5B	577305479	0.000917756	3.03727
2017	height	BS00011453_51	.	.	0.000868982	3.06099
2017	height	Excalibur_c56844_54	2A	767782559	0.000947238	3.02354
2017	height	CAP12_c7327_264	7A	732089601	0.000360745	3.4428
2017	height	BobWhite_c15109_230	.	.	0.000324468	3.48883
2017	height	Excalibur_s113043_59	3A	61308346	0.000223303	3.6511
2017	height	RAC875_rep_c112413_355	.	.	0.000764185	3.1168
2017	height	BS00075959_51	5A	588741114	1.22527e-05	4.91177
2017	height	BS00031117_51	5A	588375806	5.07635e-06	5.29445
2017	height	Kukri_c9411_676	5A	586726350	3.63041e-06	5.44004
2017	height	Excalibur_c23354_306	5A	586724451	1.25821e-05	4.90025
2017	height	IAAV3365	5A	586605778	5.57985e-06	5.25338
2017	height	wsnp_Ex_c54193_57155632	5A	586605486	4.85915e-06	5.31344
2017	height	RAC875_rep_c109716_67	5A	586597476	2.20594e-06	5.65641
2017	height	wsnp_Ex_c55777_58153636	5A	594576820	7.61563e-05	4.11829
2017	height	wsnp_Ex_rep_c109532_92292121	5A	595037357	0.000113234	3.94602
2017	height	BobWhite_c15758_79	5A	595372995	0.000149965	3.82401
2017	height	Tdurum_contig29286_319	5A	596561129	9.10226e-05	4.04085
2017	height	RAC875_c43458_126	.	.	0.000124445	3.90502
2017	height	Tdurum_contig6645_443	.	.	9.57895e-05	4.01868
2018	height	D_contig19403_486	5D	470043616	0.000935295	3.02905
2018	height	Excalibur_rep_c102984_157	2A	766399849	0.00011576	3.93644
2018	height	Kukri_c1095_1740	.	.	6.99851e-05	4.15499
2018	height	Kukri_c30197_921	.	.	0.000948181	3.02311
2018	height	BS00066232_51	2B	8592806	0.000900897	3.04532
2018	height	Excalibur_c22429_231	.	.	0.000227666	3.6427
2018	height	Excalibur_c3657_745	3A	69493927	0.000747371	3.12646
2018	height	Tdurum_contig10572_580	3A	503849073	0.000950659	3.02198
2018	height	BobWhite_rep_c49034_589	4B	38026257	0.000972349	3.01218
2018	height	RAC875_c4033_192	5A	444264987	0.000641472	3.19282
2018	height	Ku_c6319_201	5A	470036249	0.000743104	3.12895
2017	flowering	Excalibur_c80450_75	.	839	0.000933828	3.02973
2017	flowering	Ra_c19501_1510	.	1567	0.000145853	3.83608
2017	flowering	Kukri_c51047_475	.	2105	2.58328e-05	4.58783
2017	flowering	BS00068557_51	.	2487	8.99634e-05	4.04593
2017	flowering	tplb0060e05_1182	5B	572343072	0.000979938	3.0088
2017	flowering	IAAV2219	5B	577302172	0.000498052	3.30273
2017	flowering	RAC875_c50755_244	5B	577302293	0.000475857	3.32252
2017	flowering	IAAV2160	5B	577302397	0.00058833	3.23038
2017	flowering	BobWhite_c3552_1588	5B	577303366	0.000464633	3.33289
2017	flowering	Ex_c67086_584	5B	577304841	0.000510373	3.29211
2017	flowering	IAAV8463	5B	577305479	0.000672695	3.17218
2017	flowering	wsnp_Ra_c20970_30293227	5B	577305479	0.000425456	3.37115
2017	flowering	Ra_c20970_500	5B	577307686	0.000979075	3.00918
2017	flowering	RAC875_c31614_450	5B	577307708	0.000387263	3.41199
2017	flowering	wsnp_Ex_c12048_19288999	5B	577307708	0.00052154	3.28271
2017	flowering	Excalibur_c12048_1756	5B	577308453	0.000446409	3.35027
2017	flowering	CAP11_c6746_112	5B	591829842	0.000867673	3.06164
2017	flowering	IAAV5516	1B	688710381	0.000875806	3.05759
2017	flowering	tplb0050c03_1003	.	2720	0.000136098	3.86615
2017	flowering	Excalibur_c73633_120	.	1656	0.000147008	3.83266
2017	flowering	Kukri_rep_c104044_74	.	1974	0.000383536	3.41619
2017	flowering	Excalibur_c8213_83	.	2515	0.000424014	3.37262
2017	flowering	Excalibur_c53748_464	3A	714300957	7.79136e-05	4.10839
2017	flowering	Kukri_c64989_168	.	382	4.27668e-06	5.36889
2017	flowering	Kukri_c865_59	.	394	4.93287e-06	5.3069
2017	flowering	wsnp_Ex_rep_c101994_87256479	.	692	2.91626e-06	5.53517
2017	flowering	BobWhite_c40643_370	5A	575603266	0.000957869	3.01869
2017	flowering	BS00065481_51	5A	581479138	8.03812e-05	4.09485
2017	flowering	IAAV619	5A	581108102	4.29972e-05	4.36656
2017	flowering	Kukri_c20011_147	5A	580940307	1.08843e-05	4.9632
2017	flowering	wsnp_Ku_c20011_29589289	5A	580938898	7.64716e-05	4.1165
2017	flowering	wsnp_Ku_c20011_29589514	5A	580937600	7.02787e-05	4.15318
2017	flowering	wsnp_Ex_c62818_62296773	5A	580935831	6.93646e-05	4.15886
2017	flowering	wsnp_Ex_c11120_18022932	5A	580802809	1.2396e-05	4.90672
2017	flowering	BS00044408_51	5A	580802763	4.8636e-05	4.31304
2017	flowering	wsnp_Ra_c10915_17838202	5A	580802763	5.35952e-05	4.27087
2017	flowering	Ra_c14405_782	5A	579248315	0.000411146	3.386
2017	flowering	BobWhite_c23736_153	5A	578448167	3.26789e-05	4.48573
2017	flowering	BS00074299_51	5A	578061400	5.07002e-05	4.29499
2017	flowering	CAP11_c3209_76	5A	592036346	1.06218e-05	4.9738
2017	flowering	RAC875_rep_c76193_513	5A	591487483	2.20855e-06	5.65589
2017	flowering	Excalibur_c26671_57	5A	591319147	3.96492e-06	5.40177
2017	flowering	Excalibur_c26671_282	5A	591318922	2.18143e-06	5.66126
2017	flowering	IAAV8629	5A	591318780	4.6491e-06	5.33263
2017	flowering	wsnp_Ex_c621_1231444	5A	591156150	3.48523e-06	5.45777
2017	flowering	wsnp_Ex_c621_1231298	5A	591156004	3.74454e-06	5.4266
2017	flowering	RAC875_rep_c109716_67	5A	586597476	1.11022e-16	15.9546
2018	flowering	RAC875_rep_c109716_67	5A	586597476	1.11022e-16	15.9546
2017	flowering	wsnp_Ex_c54193_57155632	5A	586605486	1.11022e-16	15.9546
2018	flowering	wsnp_Ex_c54193_57155632	5A	586605486	1.11022e-16	15.9546
2017	flowering	IAAV3365	5A	586605778	1.11022e-16	15.9546
2018	flowering	IAAV3365	5A	586605778	1.11022e-16	15.9546
2017	flowering	Excalibur_c23354_306	5A	586724451	2.55351e-15	14.5929
2017	flowering	wsnp_Ex_rep_c66689_65010988	5A	585609239	2.41113e-06	5.61778
2017	flowering	wsnp_Ex_rep_c66689_65011117	5A	585609110	7.41394e-07	6.12995
2017	flowering	BS00098062_51	5A	585489452	4.83909e-07	6.31524
2017	flowering	RAC875_c9984_1003	5A	585458451	7.34571e-06	5.13397
2017	flowering	wsnp_Ex_c7729_13177883	5A	585409285	2.04199e-06	5.68995
2017	flowering	wsnp_Ex_c31799_40545478	5A	585403170	2.83247e-06	5.54784
2017	flowering	RAC875_rep_c113313_607	5A	585240597	2.55789e-06	5.59212
2017	flowering	BS00065936_51	5A	585080430	5.59547e-06	5.25216
2017	flowering	RAC875_c30566_230	5A	585020763	1.0329e-06	5.98594
2017	flowering	Excalibur_c24051_502	5A	593121193	4.00193e-06	5.39773
2017	flowering	wsnp_Ex_c2185_4094843	5A	593173030	3.94656e-06	5.40378
2017	flowering	RAC875_rep_c109969_119	5A	593332277	2.27375e-06	5.64326
2017	flowering	BS00066447_51	5A	593332352	2.85945e-06	5.54372
2017	flowering	wsnp_Ex_c44164_50292954	5A	593334252	3.80592e-06	5.41954
2017	flowering	Tdurum_contig50175_875	5A	594351599	3.36076e-06	5.47356
2018	flowering	Excalibur_c23354_306	5A	586724451	1.11022e-16	15.9546
2017	flowering	Tdurum_contig10843_745	5A	594962106	1.60358e-06	5.79491
2017	flowering	Kukri_c9411_676	5A	586726350	1.11022e-16	15.9546
2017	flowering	wsnp_Ex_c8424_14192191	5A	595146514	4.39447e-06	5.35709
2017	flowering	RFL_Contig316_572	5A	595372494	3.70973e-06	5.43066
2018	flowering	Kukri_c9411_676	5A	586726350	1.11022e-16	15.9546
2017	flowering	JD_c15758_288	5A	595373204	4.44144e-06	5.35248
2017	flowering	wsnp_CAP11_rep_c4073_1924782	5A	595409809	3.79987e-06	5.42023
2017	flowering	RFL_Contig3456_1958	5A	595896424	4.11227e-06	5.38592
2017	flowering	BS00100510_51	5A	596010510	3.69593e-06	5.43228
2017	flowering	tplb0044j06_689	5A	596013562	3.99828e-06	5.39813
2017	flowering	BS00031117_51	5A	588375806	1.11022e-16	15.9546
2017	flowering	IAAV4799	5A	598666287	0.000158517	3.79992
2017	flowering	CAP11_c1685_149	5A	607807129	4.61709e-05	4.33563
2017	flowering	Kukri_c6266_260	5A	607682939	4.95677e-05	4.3048
2017	flowering	tplb0050c03_1003	5A	607950858	6.15283e-05	4.21093
2017	flowering	Kukri_c36397_149	5A	607950101	7.50557e-05	4.12462
2017	flowering	Excalibur_c41710_417	.	2879	3.63224e-06	5.43983
2018	flowering	Tdurum_contig47816_258	.	762	9.50468e-05	4.02206
2018	flowering	Excalibur_c80450_75	.	839	0.00054116	3.26667
2018	flowering	Ra_c19501_1510	.	1567	4.60116e-05	4.33713
2018	flowering	Kukri_c25112_658	.	1956	0.000917968	3.03717
2018	flowering	Kukri_c51047_475	.	2105	0.000109131	3.96205
2018	flowering	Kukri_c29560_156	5B	567156775	0.000864315	3.06333
2018	flowering	IACX5702	5B	577227972	0.000577271	3.23862
2018	flowering	IAAV2219	5B	577302172	0.000272792	3.56417
2018	flowering	RAC875_c50755_244	5B	577302293	0.000374393	3.42667
2018	flowering	IAAV2160	5B	577302397	0.000548981	3.26044
2018	flowering	BobWhite_c3552_1588	5B	577303366	0.00031637	3.4998
2018	flowering	Ex_c67086_584	5B	577304841	0.000405458	3.39205
2018	flowering	IAAV8463	5B	577305479	0.000400371	3.39754
2018	flowering	wsnp_Ra_c20970_30293227	5B	577305479	0.000316208	3.50003
2018	flowering	Ra_c20970_500	5B	577307686	0.000952159	3.02129
2018	flowering	RAC875_c31614_450	5B	577307708	0.000255833	3.59204
2018	flowering	wsnp_Ex_c12048_19288999	5B	577307708	0.000412253	3.38484
2018	flowering	Excalibur_c12048_1756	5B	577308453	0.000359684	3.44408
2018	flowering	RFL_Contig785_1156	1B	679395341	0.000689682	3.16135
2018	flowering	tplb0050c03_1003	.	2720	0.000474739	3.32355
2018	flowering	Tdurum_contig19512_292	.	1775	0.00094197	3.02596
2018	flowering	Tdurum_contig19512_292	.	1774	0.000641946	3.1925
2018	flowering	Kukri_c64989_168	.	382	2.79175e-08	7.55412
2018	flowering	Kukri_c865_59	.	394	2.06053e-08	7.68602
2018	flowering	wsnp_Ex_rep_c101994_87256479	.	692	1.02817e-08	7.98793
2018	flowering	Tdurum_contig56267_180	5A	575603266	0.000861806	3.06459
2018	flowering	BS00065481_51	5A	581479138	4.65076e-06	5.33248
2018	flowering	IAAV619	5A	581108102	3.17682e-06	5.49801
2018	flowering	wsnp_Ku_c20011_29589289	5A	580938898	4.17246e-06	5.37961
2018	flowering	wsnp_Ku_c20011_29589514	5A	580937600	4.12034e-06	5.38507
2018	flowering	wsnp_Ex_c62818_62296773	5A	580935831	4.49368e-06	5.3474
2018	flowering	wsnp_Ex_c11120_18022932	5A	580802809	9.59886e-06	5.01778
2018	flowering	BS00044408_51	5A	580802763	4.89954e-06	5.30984
2018	flowering	wsnp_Ra_c10915_17838202	5A	580802763	5.04439e-06	5.29719
2018	flowering	Ra_c14405_782	5A	579248315	8.60949e-05	4.06502
2018	flowering	BobWhite_c23736_153	5A	578448167	3.22396e-06	5.49161
2018	flowering	BS00074299_51	5A	578061400	4.67737e-06	5.33
2018	flowering	CAP11_c3209_76	5A	592036346	3.49841e-06	5.45613
2018	flowering	RAC875_rep_c76193_513	5A	591487483	9.92408e-09	8.00331
2018	flowering	Excalibur_c26671_57	5A	591319147	1.20203e-08	7.92008
2018	flowering	Excalibur_c26671_282	5A	591318922	1.11874e-08	7.95127
2018	flowering	IAAV8629	5A	591318780	1.9797e-08	7.7034
2018	flowering	wsnp_Ex_c621_1231444	5A	591156150	1.03868e-08	7.98352
2018	flowering	wsnp_Ex_c621_1231298	5A	591156004	1.09753e-08	7.95958
2018	flowering	BS00031117_51	5A	588375806	1.11022e-16	15.9546
2017	flowering	BS00075959_51	5A	588741114	4.44089e-16	15.3525
2018	flowering	BS00075959_51	5A	588741114	1.11022e-16	15.9546
2017	flowering	wsnp_Ex_c55777_58153636	5A	594576820	2.84017e-12	11.5467
2018	flowering	wsnp_Ex_c55777_58153636	5A	594576820	2.22045e-16	15.6536
2017	flowering	wsnp_Ex_rep_c109532_92292121	5A	595037357	8.47211e-13	12.072
2018	flowering	wsnp_Ex_rep_c109532_92292121	5A	595037357	1.11022e-16	15.9546
2018	flowering	wsnp_Ex_rep_c66689_65010988	5A	585609239	2.40094e-07	6.61962
2018	flowering	wsnp_Ex_rep_c66689_65011117	5A	585609110	1.21018e-07	6.91715
2018	flowering	BS00098062_51	5A	585489452	1.76577e-07	6.75307
2018	flowering	RAC875_c9984_1003	5A	585458451	3.06282e-07	6.51388
2018	flowering	wsnp_Ex_c7729_13177883	5A	585409285	2.40311e-07	6.61923
2018	flowering	wsnp_Ex_c31799_40545478	5A	585403170	2.80578e-07	6.55195
2018	flowering	RAC875_rep_c113313_607	5A	585240597	2.13316e-07	6.67098
2018	flowering	BS00065936_51	5A	585080430	2.47237e-07	6.60689
2018	flowering	RAC875_c30566_230	5A	585020763	1.51004e-07	6.82101
2018	flowering	Excalibur_c24051_502	5A	593121193	1.70688e-08	7.7678
2018	flowering	wsnp_Ex_c2185_4094843	5A	593173030	1.08154e-08	7.96596
2018	flowering	RAC875_rep_c109969_119	5A	593332277	1.1138e-08	7.95319
2018	flowering	BS00066447_51	5A	593332352	1.15293e-08	7.9382
2018	flowering	wsnp_Ex_c44164_50292954	5A	593334252	1.08573e-08	7.96428
2018	flowering	Tdurum_contig50175_875	5A	594351599	9.25731e-09	8.03352
2017	flowering	BobWhite_c15758_79	5A	595372995	8.6533e-12	11.0628
2018	flowering	Tdurum_contig10843_745	5A	594962106	9.35022e-09	8.02918
2018	flowering	BobWhite_c15758_79	5A	595372995	3.33067e-16	15.4775
2018	flowering	wsnp_Ex_c8424_14192191	5A	595146514	1.72217e-08	7.76392
2018	flowering	RFL_Contig316_572	5A	595372494	1.002e-08	7.99913
2017	flowering	Tdurum_contig29286_319	5A	596561129	1.42115e-11	10.8474
2018	flowering	JD_c15758_288	5A	595373204	3.87347e-08	7.4119
2018	flowering	wsnp_CAP11_rep_c4073_1924782	5A	595409809	1.52838e-08	7.81577
2018	flowering	RFL_Contig3456_1958	5A	595896424	8.54748e-06	5.06816
2018	flowering	BS00100510_51	5A	596010510	1.01299e-08	7.99439
2018	flowering	tplb0044j06_689	5A	596013562	1.54246e-08	7.81179
2018	flowering	wsnp_Ex_c5978_10478584	5A	596463420	0.000259638	3.58563
2018	flowering	wsnp_Ra_c3966_7286546	5A	596465167	0.000314192	3.50281
2018	flowering	Ku_c12469_983	5A	596520995	5.7203e-05	4.24258
2018	flowering	Ku_c12469_837	5A	596521141	5.18255e-05	4.28546
2018	flowering	Tdurum_contig29286_319	5A	596561129	2.22045e-16	15.6536
2018	flowering	IAAV4799	5A	598666287	1.20486e-05	4.91906
2018	flowering	CAP11_c1685_149	5A	607807129	0.000101901	3.99182
2018	flowering	Kukri_c6266_260	5A	607682939	0.000138651	3.85808
2018	flowering	tplb0050c03_1003	5A	607950858	0.000149315	3.8259
2018	flowering	Kukri_c36397_149	5A	607950101	5.82685e-05	4.23457
2018	flowering	BobWhite_c15476_88	5A	625732721	9.17468e-05	4.03741
2018	flowering	Excalibur_c41710_417	.	2879	9.64126e-09	8.01587
2018	flowering	Tdurum_contig47816_258	6B	22745658	0.000800752	3.0965
